# Supplementary material
Source: HighWire-hosted journal article supplement (https://www.ajnr.org/highwire/filestream/55037/field_highwire_adjunct_files/0/17-00036.pdf)
Supplement: 17-00036.pdf [file 17-00036.pdf]

**On-line Table: Mean score at each location using 3T and 1.5T magnets**

| Compartment, Location        | 1.5T | 3T   | P Value |
|------------------------------|------|------|---------|
| Supratentorial               |      |      |         |
| Multilayer brain parenchyma  | 2.09 | 2.17 | 1.00    |
| Corpus callosum              | 1.78 | 2.25 | .30     |
| Septum pellucidum            | 1.81 | 2.38 | .09     |
| Pituitary stalk              | 1.16 | 2.29 | <.001   |
| Transverse sinus             | 1.81 | 2.88 | <.001   |
| Superior sagittal sinus      | 1.91 | 2.96 | <.001   |
| Straight sinus               | 1.75 | 2.88 | <.001   |
| Cerebral peduncles           | 1.91 | 2.08 | 1.00    |
| Infratentorial               |      |      |         |
| Myelination of midbrain      | 1.97 | 2.12 | 1.00    |
| Aqueduct of Sylvius          | 1.03 | 0.88 | 1.00    |
| Belly of the pons            | 1.47 | 2.25 | .00     |
| Primary cerebellar fissure   | 1.53 | 2.38 | <.001   |
| Secondary cerebellar fissure | 0.47 | 1.96 | <.001   |
| Fastigial point              | 1.69 | 2.75 | <.001   |
| Cerebellar shape             | 2.28 | 2.58 | .92     |
| Optic system                 |      |      |         |
| Globes                       | 2.44 | 2.83 | .59     |
| Optic nerves                 | 1.75 | 2.29 | .12     |
| Optic chiasm                 | 1.25 | 1.96 | .01     |
| Auditory system              |      |      |         |
| Pinnae                       | 1.66 | 2.54 | <.001   |
| Cochlea                      | 1.09 | 2.67 | <.001   |
| Semicircular canals          | 0.62 | 2.21 | <.001   |
| Face                         |      |      |         |
| Choanae                      | 1.78 | 2.33 | .11     |
| Facial profile               | 2.09 | 2.62 | .14     |

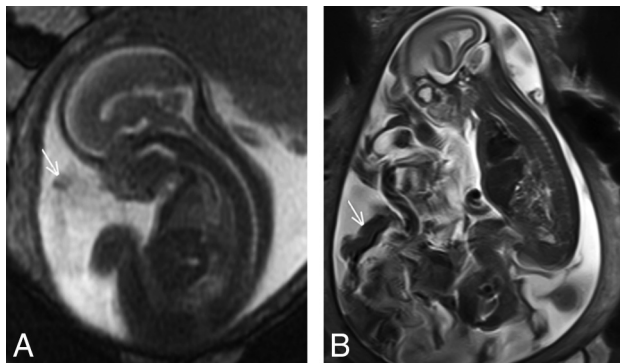

**ON-LINE FIGURE.** Comparison of susceptibility artifacts on 1.5 T and 3T magnets. The heterogeneous signal pattern of the amniotic fluid is due to a secondary generation of standing waves with a constructive and destructive interface. This produces hypointense areas alternating with hyperintense areas. *A*, Fetal MR imaging performed at 1.5T, GA of 21 weeks, demonstrates mild heterogeneity of the amniotic fluid (*arrow*). *B*, Fetal MR imaging, performed at 3T, shows marked heterogeneity of the amniotic fluid flow (*arrow*).
